# Supplementary material
Source: PubMed Central journal article supplement (PMC2980296)
Supplement: NIHMS228026-supplement-2.pdf [file NIHMS228026-supplement-2.pdf]

| Normal Silencing (Fig. 2a) |          |              |              | Abnormal Silencing (Fig. 2b) |          |          |
|----------------------------|----------|--------------|--------------|------------------------------|----------|----------|
| MR46                       | MR45     | MP2          | MP4          | MR46                         | MR45     | MP2      |
| A2M                        | A2M      | A1L4H1_HUMAN | A1L4H1_HUMAN | ABCC3                        | ABCC3    | ABCC4    |
| ABCC4                      | ABCC4    | A2M          | A2M          | ADAMTS2                      | ADC      | ABHD14B  |
| ABHD14A                    | ABHD14A  | A4GALT       | ABLIM3       | ADC                          | AFF3     | ADAM12   |
| ABHD14B                    | ABHD14B  | ABCC3        | ADAMTS6      | AFF3                         | AMPD3    | ADAMTS2  |
| ABLIM3                     | ABHD7    | ABLIM3       | AFAP1        | BDKRB2                       | APCDD1   | ADCK5    |
| ADAMTS6                    | ABLIM3   | ADAMTS6      | AFF3         | BGN                          | ARHGAP6  | ADRB2    |
| ADCK5                      | ADAMTS5  | ADRA1B       | ALDH3B1      | C14orf167                    | ARSA     | AK5      |
| ADHFE1                     | ADAMTS6  | AFAP1        | AMPH         | C1orf213                     | BDKRB2   | ALPK2    |
| ADRA1B                     | ADCY6    | AFF3         | ANKH         | C9orf150                     | BGN      | ALS2CR16 |
| AFAP1                      | ADHFE1   | AKT1         | ANKRD34      | CD302                        | C10orf10 | AMIGO2   |
| ALDH3B1                    | ADRA1B   | AKT1S1       | APCDD1L      | CDC2L6                       | C9orf150 | AMOT     |
| ANGPT1                     | ALDH3B1  | ALDH3B1      | ARHGAP20     | CEBPE                        | CAPN8    | ANPEP    |
| ANKH                       | ALPK2    | AMPH         | ATOH8        | CLEC11A                      | CD302    | ANTXR2   |
| ANKRD34                    | ANGPT1   | ANGPT1       | ATP10D       | CLIP3                        | CDC2L6   | AOX1     |
| ANKRD42                    | ANKH     | ANKH         | ATP8B1       | CNTNAP1                      | CEBPE    | APCDD1L  |
| ANKRD44                    | ANKRD25  | ANKRD34      | BAHCC1       | COL6A2                       | CENTB5   | ARMCX6   |
| ANPEP                      | ANKRD34  | ANKRD44      | BCL9L        | COPZ2                        | CLIP3    | ARRDC4   |
| ANTXR2                     | ANKRD42  | AREG         | BIRC3        | CSF1                         | CNTNAP1  | BAI2     |
| AOF1                       | ANKRD44  | ARHGAP20     | BMP1         | CSPG4                        | COL6A2   | BGN      |
| APPL2                      | ANPEP    | ARHGAP24     | BTN3A1       | CTBS                         | COL8A1   | BHLHB3   |
| ARHGAP20                   | ANTXR2   | ASB8         | BTN3A3       | CUL7                         | COPZ2    | C11orf69 |
| ARHGAP24                   | AOF1     | ATOH8        | C10orf10     | DDR2                         | CREB5    | C13orf15 |
| ARHGAP6                    | APPL2    | ATP10A       | C10orf116    | DUSP10                       | CSF1     | C6orf98  |
| ARID5A                     | ARHGAP20 | ATP10D       | C1QTNF2      | ECM1                         | CSPG4    | C9orf121 |
| ARSB                       | ARID5A   | ATP7A        | C21orf7      | EPHB3                        | CST3     | CA12     |
| ASAH1                      | ARID5B   | ATP8B1       | C4orf22      | FAM132B                      | CTS2     | CACNA1H  |
| ATOH8                      | ARSB     | ATXN1        | C5orf23      | FAM26B                       | CUL7     | CAMK2N1  |
| ATP10A                     | ATOH8    | AYTL1        | C6orf150     | FKBP9L                       | DCN      | CAT      |
| ATP7A                      | ATP10A   | BAHCC1       | C6orf65      | GLIS1                        | DDIT3    | CDH4     |
| ATXN1                      | ATP7A    | BCL9L        | C8orf48      | HOXA5                        | DDR2     | CLEC11A  |
| BAHCC1                     | ATXN1    | BDKRB1       | C9orf53      | ICAM1                        | DUSP10   | CLIP4    |
| BAI2                       | AYTL1    | BICC1        | CASP1        | ICAM5                        | DYRK3    | COL3A1   |
| BDKRB1                     | BAHCC1   | BMP1         | CASP5        | ITGB3                        | ECE1     | COL5A3   |
| BICC1                      | BAI2     | BNC2         | CCDC102B     | KAZALD1                      | ECM1     | COL6A2   |
| BTBD9                      | BDKRB1   | BTN3A1       | CD33L3       | LIF                          | EPHB3    | COPZ2    |

|           |           |           |                |                |                |                |
|-----------|-----------|-----------|----------------|----------------|----------------|----------------|
| BTN3A1    | BICC1     | BTN3A3    | CD68           | LRRC17         | ESPNL          | CXorf6         |
| BTN3A3    | BMI1      | BVES      | CDH15          | MAGEA10        | F10            | DCN            |
| C10orf33  | BMP1      | C10orf10  | CDX2           | MEIS1          | FAM113A        | DKK1           |
| C10orf56  | BST1      | C10orf116 | CEACAM3        | NFIA           | FAM132B        | DLX1           |
| C13orf15  | BTBD9     | C10orf33  | CEBPE          | NP_001007190.1 | FAM26B         | EDG2           |
| C14orf45  | BTN3A1    | C1QTNF2   | CENTB5         | NP_116012.2    | FKBP9          | ENSG0000020348 |
| C1RL      | BTN3A3    | C1orf86   | CLCF1          | NTNG2          | FKBP9L         | EPHB3          |
| C1orf53   | C10orf33  | C21orf7   | CLDN1          | NUDT18         | FLNC           | EYA2           |
| C1orf86   | C10orf56  | C4orf22   | CLEC14A        | OAF            | FZD1           | EYA4           |
| C2        | C13orf15  | C5orf23   | CLEC2B         | OTUD7A         | GJA12          | F10            |
| C20orf194 | C14orf149 | C6orf145  | CLEC3B         | PHLDA1         | GLIS1          | FAM132B        |
| C3orf54   | C14orf45  | C6orf150  | COL15A1        | PIK3IP1        | GRK5           | FAM26B         |
| C4orf22   | C15orf37  | C6orf65   | COL5A3         | PLGLA1         | HAAO           | FAM89A         |
| C5orf23   | C1RL      | C9orf150  | CORO2B         | PPP1R15A       | HOXA5          | FAP            |
| C6orf145  | C1orf160  | C9orf53   | CPA4           | PTGS1          | ICAM5          | FMN2           |
| C6orf65   | C1orf53   | C9orf94   | CRH            | PXK            | ITGB3          | FMOD           |
| C6orf98   | C1orf86   | CASP1     | CRISPLD2       | Q86V40_HUMAN   | LIF            | FOXF1          |
| C7orf10   | C2        | CASP5     | CROT           | Q9GZQ9_HUMAN   | LRRC17         | FOXF2          |
| C8orf34   | C20orf194 | CCDC102B  | CSF1           | Q9HBR0_HUMAN   | MAFF           | GALNT5         |
| C9orf103  | C4orf22   | CCDC68    | DDR2           | ROM1           | MAGEA10        | GAS6           |
| C9orf53   | C5orf23   | CCDC89    | DGKI           | SCML1          | MAP1LC3A       | GATA6          |
| CAPS      | C6orf145  | CCDC92    | DIXDC1         | SDSL           | MDGA1          | GLIS1          |
| CASP1     | C6orf65   | CD274     | DLL4           | SGCD           | MEIS1          | GNRH1          |
| CASP5     | C6orf98   | CD302     | DPF3           | SHC3           | NAV3           | GREM2          |
| CCDC102A  | C8orf34   | CD33L3    | ENG            | SLC26A10       | NFIA           | HAS2           |
| CCDC102B  | C8orf4    | CD68      | ENSG0000017934 | SLC9A9         | NP_001007190.1 | HMCN1          |
| CCDC92    | C9orf103  | CD82      | ENSG0000018028 | SMTN           | NP_057218.1    | HOXA4          |
| CCT6B     | C9orf53   | CDC2L6    | ENSG0000020353 | SP140          | NP_079178.2    | HOXA5          |
| CD151     | CAPS      | CDH15     | ENSG0000020409 | STARD5         | NP_116012.2    | HOXB4          |
| CD274     | CASP1     | CDH7      | ENSG0000020460 | TENC1          | NR2F2          | HOXB5          |
| CD68      | CASP5     | CDX2      | EVC            | TGFB1          | NUDT18         | HOXB6          |
| CD82      | CCDC102A  | CEACAM3   | F2RL2          | TNFRSF14       | PDE4DIP        | HS3ST3A1       |
| CDH4      | CCDC102B  | CEBPE     | FABP4          | TRPC3          | PHLDA1         | HSPA12A        |
| CDKL1     | CCDC68    | CEECAM1   | FAM26E         | TSHZ1          | PIK3IP1        | HSPB2          |
| CDX2      | CCDC92    | CENTB5    | FCRLB          | YAF2           | PIK3R1         | IER5L          |
| CEECAM1   | CCDC96    | CFH       | FGF14          |                | PLAC9          | IGFBP3         |
| CFH       | CCT6B     | CFHR3     | FGF5           |                | PLGLA1         | IGFBP5         |

|                |             |             |            |              |                |
|----------------|-------------|-------------|------------|--------------|----------------|
| CFHR3          | CD109       | CGAT1_HUMAN | FGL2       | PLP2         | IL1RAPL1       |
| CGAT1_HUMAN    | CD274       | CHD3        | FOXD1      | PLXNA3       | INSR           |
| CHD3           | CD68        | CLDN1       | FRMD5      | PPP1R15A     | KCNIP3         |
| CHRM2          | CD82        | CLEC14A     | FSTL3      | PPP2R5B      | KCNJ8          |
| CISH           | CDH4        | CLEC2B      | GABRB1     | PTGS1        | KIAA1462       |
| CLCF1          | CDKL1       | CLEC3B      | GBP1       | Q9BVM4_HUMAN | KIF26B         |
| CLEC2B         | CDX2        | CNTN3       | GBP3       | RCN3         | KIT            |
| CLEC3B         | CEECAM1     | COL15A1     | GBP7       | RGAG4        | KLF7           |
| CLIP2          | CFH         | CPA4        | GET1_HUMAN | RHOJ         | LAMB3          |
| CLIP4          | CFHR3       | CPEB2       | GRIK2      | SAMD14       | LIN7A          |
| CNTN3          | CGAT1_HUMAN | CPNE7       | GRPR       | SCD5         | LOXL4          |
| COL15A1        | CHD3        | CRH         | HHIP       | SCML1        | LRP11          |
| CRAT           | CIDEC       | CRIP2       | HIC1       | SDSL         | LRRC32         |
| CST5           | CLCF1       | CRISPLD2    | HIST1H2AC  | SGCD         | LSAMP          |
| CTAG2          | CLEC2B      | CROT        | HOP_HUMAN  | SHC3         | LTBR           |
| CXorf6         | CLEC3B      | CSF1        | HOXA2      | SKAP2        | LUM            |
| CYBASC3        | CLIP4       | CST5        | HRH1       | SLC26A10     | LY6E           |
| DAAM2          | CNTN3       | CUL7        | HTR2B      | SLC9A9       | MAP3K5         |
| DCHS1          | COL15A1     | CYBASC3     | IL15RA     | SMPD1        | MGAT5          |
| DENND1B        | CRAT        | CYBRD1      | IL1R1      | SMTN         | MLLT3          |
| DENND4A        | CST5        | DACH2       | IL21R      | SOAT1        | MLPH           |
| DGKI           | CTAG2       | DDR2        | IRF1       | SP140        | MMP1           |
| DLX1           | CXorf6      | DENND1B     | ITGA2      | SPOCD1       | MXRA5          |
| DOCK10         | CYBASC3     | DGKA        | ITGB3      | SYTL2        | NFIX           |
| DPYD           | DAAM2       | DGKI        | ITGBL1     | TBX2         | NID2           |
| ECE1           | DBNL        | DIP2C       | KALRN      | TCEA3        | NNMT           |
| EDNRA          | DCHS1       | DLL4        | KCNE4      | TENC1        | NP_001001991.1 |
| EGFR           | DENND1B     | DNAH5       | KIAA1199   | TGFB1        | NP_001018000.1 |
| ENG            | DENND4A     | DNASE2      | KIAA1946   | TLN1         | NP_079045.1    |
| ENSG0000020353 | DGKI        | DOCK10      | KIRREL3    | TMCO4        | NR2F1          |
| ENSG0000020460 | DLX1        | DOK6        | KRT34      | TNFAIP3      | NRG1           |
| EPHB2          | DNAH5       | DPF3        | KRTAP1-3   | TNFRSF14     | NRXN3          |
| ERMAP          | DOCK10      | DPP4        | LPXN       | TRPC3        | NTF3           |
| EVC            | DPYD        | DPYD        | LRRC15     | TSHZ1        | NTN4           |
| EYA2           | DUSP18      | DRD1        | LRRC2      | WIPF1        | NTNG2          |
| EYA4           | EGFR        | DTX3L       | LRRC32     | YAF2         | NUDT18         |
| F10            | EHD3        | ECE1        | LSAMP      | ZEB2         | NUPR1_HUMAN    |

|         |                |                |                |              |
|---------|----------------|----------------|----------------|--------------|
| FABP4   | ENG            | ECGF1          | LTBR           | OLFM2        |
| FAM46C  | ENSG0000018260 | EDG1           | LY96           | OLFML2A      |
| FAM69A  | ENSG0000020353 | EDNRA          | MAML2          | OXTR         |
| FBXO4   | ENSG0000020460 | EGFR           | MAP1A          | PCDHB11      |
| FGF14   | ERMAP          | ENG            | MAP1LC3A       | PCDHB7       |
| FGF5    | ESM1           | ENSG0000017934 | MDGA1          | PDE8A        |
| FGL2    | EVC            | ENSG0000020349 | MLKL           | PDGFRA       |
| FKBP9   | EXOC3          | ENSG0000020353 | MPP4           | PDZK1        |
| FMN2    | EYA2           | ENSG0000020460 | MRC2           | PID1         |
| FOXF2   | EYA4           | EPHB2          | MRVI1          | PLAC9        |
| FSTL3   | F2RL2          | EPS8           | MYBL1          | PLCE1        |
| GALNT10 | FABP4          | ESM1           | NACAD          | PPARG        |
| GALNT5  | FAM26E         | EVC            | NAP5_HUMAN     | PRDM1        |
| GAS6    | FAM46C         | EVI1           | NCAM2          | PRRX1        |
| GBAP    | FAM69A         | EVI5L          | NCF2           | PSG6         |
| GBP1    | FBLN5          | F2RL2          | NFIX           | PSG8         |
| GBP3    | FBXO4          | F7             | NFKBIZ         | PSG9         |
| GBP7    | FBXW8          | FABP4          | NKX3-1         | PTGS1        |
| GK3P    | FGF14          | FAM109B        | NLRP1          | Q4ZG65_HUMAN |
| GNS     | FGF5           | FAM26E         | NOV            | Q5J7V3_HUMAN |
| GPR155  | FGF7           | FAM46C         | NPAS2          | Q96NA9_HUMAN |
| GPR68   | FGL2           | FCRLB          | NPR3           | RAMP1        |
| HCFC2   | FILIP1L        | FGF14          | NPTX1          | RARG         |
| HEG1    | FOXF2          | FGF5           | NP_001007190.1 | RGS4         |
| HHEX    | FRY            | FGL2           | NP_001017534.1 | RIN2         |
| HIC1    | FSTL3          | FILIP1L        | NP_001025035.1 | RNF128       |
| HIPK3   | GALNS          | FKBP9          | NP_065805.1    | RUNX2        |
| HIVEP3  | GALNT10        | FKBP9L         | NP_071745.1    | SAMD11       |
| HOXA2   | GALNT5         | FOSL1          | NP_073574.1    | SAMD5        |
| HOXA4   | GAS6           | FOXD1          | NP_079189.3    | SCD5         |
| HOXA7   | GBAP           | FSTL3          | NP_976249.1    | SEMA5A       |
| HOXB3   | GBP1           | G6PD           | NP_997263.1    | SEMA6D       |
| HOXB4   | GBP3           | GABRB1         | NTSR1          | SERPINB2     |
| HOXB5   | GBP7           | GALNT6         | O14513-3       | SIM2         |
| HPCAL1  | GK             | GBP1           | OAF            | SIX1         |
| HR      | GK3P           | GBP3           | OSMR           | SLC15A3      |
| HRH1    | GLT8D2         | GBP7           | OSR2           | SLIT2        |

|          |        |            |              |          |
|----------|--------|------------|--------------|----------|
| HSPB6    | GNS    | GET1_HUMAN | P4HA3        | SMAD9    |
| HTR2B    | GPR155 | GK3P       | PARD3B       | SNAI2    |
| IBRDC1   | GPR68  | GMPPA      | PBLD         | SP110    |
| IDUA     | GREM1  | GOLGA2L1   | PDE4DIP      | SPHK1    |
| IFI44    | GREM2  | GPR155     | PDE8A        | STK32B   |
| IFIT2    | HCFC2  | GPRIN1     | PDGFRL       | STOM     |
| IL10RB   | HEG1   | GRIK2      | PIK3IP1      | SVEP1    |
| IL15RA   | HHAT   | HHEX       | PIK3R3       | TBC1D8B  |
| IL1R1    | HHEX   | HHIP       | PLA2G4C      | TBX2     |
| IL7R     | HIC1   | HIC1       | PLCL1        | TCEA3    |
| ITGBL1   | HIVEP3 | HIPK3      | PPARA        | TCP11L2  |
| KCNE4    | HOXA2  | HOP_HUMAN  | PRKCE        | TMEM166  |
| KCNJ8    | HOXA4  | HOXA2      | PRPH2        | TMEM16A  |
| KCNK2    | HOXA7  | HOXB3      | PRR16        | TMEM54   |
| KCTD18   | HOXB3  | HRH1       | PRSS3        | TNFRSF19 |
| KDELC2   | HOXB4  | HS3ST3B1   | PSG1         | TRPA1    |
| KIAA0427 | HOXB5  | HTR2B      | PSG2         | TXNRD3   |
| KIAA1107 | HR     | ICAM5      | PSG9         | VDR      |
| KIAA1199 | HRH1   | IDUA       | PTGER2       | WIPF1    |
| KIAA1683 | HSPB6  | IL15RA     | PTGFR        | XYLT1    |
| KIAA1946 | HTR2B  | IL17D      | PTRF         | ZFPM2    |
| KIRREL3  | IBRDC1 | IL1R1      | Q587I5_HUMAN | ZNF179   |
| KRT121P  | ICAM1  | IL21R      | Q5H9U9_HUMAN | ZNF521   |
| LAMA2    | IDUA   | IL7R       | Q5J7V3_HUMAN | ZNF703   |
| LAMA4    | IFI44  | IRF1       | Q6ZSS2_HUMAN |          |
| LMAN1L   | IFIT2  | ITGA2      | Q7Z756_HUMAN |          |
| LRRC23   | IL10RB | ITGA4      | Q96HG1_HUMAN |          |
| LRRN3    | IL15RA | ITGB3      | Q9H8A7_HUMAN |          |
| LTBP3    | IL17RA | ITGBL1     | RAB33A       |          |
| LTBR     | IL1R1  | KALRN      | RBM43        |          |
| LY96     | IL7R   | KCNE4      | RCN3         |          |
| LYST     | INPP1  | KCNJ2      | RELN         |          |
| MAFF     | ITGA2  | KCNK2      | RHOJ         |          |
| MAML2    | ITGBL1 | KCNMA1     | RIN3         |          |
| MAP1A    | ITPKA  | KCNQ5      | RRAD         |          |
| MDGA1    | KCNE4  | KCTD9      | SAMD11       |          |
| MEGF9    | KCNJ2  | KIAA0427   | SAMD9        |          |

|                |           |            |           |
|----------------|-----------|------------|-----------|
| MGAT5          | KCNK2     | KIAA1199   | SAMD9L    |
| MOBKL2C        | KCTD18    | KIAA1377   | SDPR      |
| MPP4           | KIAA0280  | KIAA1946   | SEMA3C    |
| MR1            | KIAA0427  | KIFC3      | SEMA7A    |
| MRC2           | KIAA1107  | KIRREL3    | SGIP1     |
| MRVI1          | KIAA1199  | KLF2       | SHC4      |
| NAP5_HUMAN     | KIAA1683  | KLF4       | SIM2      |
| NCAM2          | KIAA1946  | KRT34      | SIRPB1    |
| NEGR1          | KIRREL3   | KRTAP1-3   | SLC14A1   |
| NFIC           | KRT121P   | LIF        | SLC16A4   |
| NFIX           | KRTAP1-3  | LPXN       | SLC22A4   |
| NID1           | LMAN1L    | LRCH2      | SLC4A4    |
| NOV            | LOC440804 | LRRC15     | SMAD6     |
| NPAS2          | LOXL4     | LRRC8C     | SMPD1     |
| NPR3           | LRRC23    | LRRK1      | SNCAIP    |
| NP_001001991.1 | LRRC56    | LRRN3      | SOX9      |
| NP_001004306.1 | LRRN3     | LTBP3      | SPESP1    |
| NP_001013739.1 | LTBP3     | LTK        | SPHK1     |
| NP_001017534.1 | LTBR      | LY96       | SRGAP1    |
| NP_001073948.1 | LY96      | LYST       | SRGN      |
| NP_065930.2    | LYST      | MAML2      | SSPN      |
| NP_071745.1    | MAP1A     | MAP1A      | SSTR1     |
| NP_079178.2    | MAP3K12   | MAP1LC3A   | STARD5    |
| NP_079189.3    | MAP3K5    | MAP3K12    | SYTL3     |
| NP_079425.2    | MBD2      | MDGA1      | TBC1D8B   |
| NP_085139.2    | MDFIC     | MEF2C      | TBX5      |
| NP_653323.1    | ME3       | MEGF9      | TCEA3     |
| NP_795372.1    | MEGF9     | MEIS1      | TCF21     |
| NP_955369.1    | MGAT5     | MEIS2      | TCP11L2   |
| NP_976249.1    | MGLL      | MIB2       | TEF       |
| NP_997263.1    | MITF      | MITF       | TGFB11    |
| NTF3           | MMP1      | MPP4       | TGFBI     |
| NUCB1          | MOBKL2C   | MRAS       | TMEM130   |
| NUMA1          | MPP4      | MRC2       | TMOD2     |
| NUPR1_HUMAN    | MR1       | MRVI1      | TNFAIP6   |
| O14513-3       | MRC2      | NACAD      | TNFAIP8L3 |
| OSMR           | MRVI1     | NAP5_HUMAN | TNFRSF19  |

|              |                |                |        |
|--------------|----------------|----------------|--------|
| OSR1         | MSRB3          | NCAM2          | TNFSF4 |
| OSR2         | MXRA5          | NEGR1          | TRHDE  |
| P4HA3        | NAP5_HUMAN     | NFIC           | TRIM5  |
| PAPPA        | NCAM2          | NLRP1          | TRIM55 |
| PARD3B       | NEDD9          | NO55_HUMAN     | ULBP2  |
| PBLD         | NEGR1          | NOV            | VCAM1  |
| PDE8A        | NFIC           | NPAS2          | VEPH1  |
| PDK2         | NFIX           | NPR3           | WDR66  |
| PIK3R1       | NFKBIZ         | NP_001004306.1 | WFDC1  |
| PITX1        | NID1           | NP_001017534.1 | WNT16  |
| PKD1         | NMNAT1         | NP_001025035.1 | ZBTB20 |
| PLA2G4C      | NOV            | NP_055654.2    | ZFP28  |
| PLAC9        | NPAS2          | NP_065805.1    | ZFPM2  |
| PLG          | NPR3           | NP_065930.2    | ZNF25  |
| PLSCR4       | NP_001001991.1 | NP_071745.1    | ZNF503 |
| POSTN        | NP_001004306.1 | NP_073574.1    | ZNF568 |
| PPARA        | NP_001013739.1 | NP_079189.3    | ZNF818 |
| PPARG        | NP_001017534.1 | NP_795372.1    | ZNFX1  |
| PPP2R5B      | NP_001073948.1 | NP_976249.1    |        |
| PRKCE        | NP_055654.2    | NP_997263.1    |        |
| PRPH2        | NP_065930.2    | NTRI_HUMAN     |        |
| PRRX1        | NP_071745.1    | NTSR1          |        |
| PTGER2       | NP_079189.3    | O14513-3       |        |
| PTGER4       | NP_085139.2    | OAF            |        |
| PTGFR        | NP_653323.1    | OSMR           |        |
| PTPLAD2      | NP_795372.1    | OSR1           |        |
| PTRF         | NP_976249.1    | OSR2           |        |
| Q0VFW9_HUMAN | NP_997263.1    | P4HA3          |        |
| Q4ZG65_HUMAN | NR2F1          | PAPPA          |        |
| Q580R0-2     | NRP2           | PARD3B         |        |
| Q5H9U9_HUMAN | NT5E           | PARVB          |        |
| Q68CW3_HUMAN | NTF3           | PCDH7          |        |
| Q6XYE2_HUMAN | NTRI_HUMAN     | PCDH9          |        |
| Q6ZSY1_HUMAN | NUPR1_HUMAN    | PCYT2          |        |
| Q7Z3M5_HUMAN | O14513-3       | PDE5A          |        |
| Q8N8S4_HUMAN | OAF            | PDZRN3         |        |
| Q8NHA3_HUMAN | OSMR           | PEG3           |        |

|              |              |              |
|--------------|--------------|--------------|
| Q96HG1_HUMAN | OSR1         | PER3         |
| Q96NA9_HUMAN | OSR2         | PHLDA1       |
| Q96NU5_HUMAN | P4HA3        | PHLDB1       |
| Q9BR82_HUMAN | PAPPA        | PIK3IP1      |
| Q9H8A7_HUMAN | PARD3B       | PITX1        |
| Q9HCM6_HUMAN | PCDH9        | PLEK2        |
| RAB7L1       | PCGF5        | PLEKHN1      |
| RAD21L1      | PDK2         | PPARA        |
| RASL11A      | PDZRN3       | PPM1M        |
| RBM43        | PITX1        | PRKCE        |
| RELA         | PKD1         | PRR16        |
| RELN         | PLA2G4C      | PRSS12       |
| RFX2         | PLCL1        | PSG1         |
| RGAG4        | PLEKHA6      | PSG2         |
| RGS12        | PLG          | PSG5         |
| RIN3         | POSTN        | PTGER2       |
| RNASEL       | PPARA        | PTGFR        |
| RNF152       | PPARG        | PTRF         |
| RNF215       | PQLC2        | PXK          |
| RUNDC2A      | PRICKLE2     | Q0VFW9_HUMAN |
| RUNX1        | PRKCE        | Q587I5_HUMAN |
| RUNX2        | PRPH2        | Q5H9U9_HUMAN |
| SAMD11       | PRRX1        | Q68CW3_HUMAN |
| SAMD5        | PSG2         | Q6XYE2_HUMAN |
| SAMD9        | PSG6         | Q6ZSS2_HUMAN |
| SAMD9L       | PSG8         | Q6ZSY1_HUMAN |
| SCN9A        | PTGER2       | Q7Z3M5_HUMAN |
| SCUBE2       | PTGER4       | Q7Z756_HUMAN |
| SDC3         | PTGFR        | Q86V40_HUMAN |
| SDPR         | PTPLAD2      | Q96HF5_HUMAN |
| SECTM1       | PTRF         | Q9HCM6_HUMAN |
| SERINC2      | PVR          | RAB33A       |
| SGIP1        | PXK          | RAB3A        |
| SHC4         | Q4ZG65_HUMAN | RAD21L1      |
| SHOX         | Q580R0-2     | RASL11A      |
| SIM2         | Q587I5_HUMAN | RBM24        |
| SIRPB1       | Q5J7V3_HUMAN | RBM43        |



|          |              |          |
|----------|--------------|----------|
| SIRPB2   | Q68CW3_HUMAN | RCN3     |
| SIRT2    | Q6XYE2_HUMAN | RELN     |
| SIX1     | Q6ZP74_HUMAN | RFX2     |
| SLC13A2  | Q6ZSY1_HUMAN | RIN3     |
| SLC14A1  | Q7Z3M5_HUMAN | ROM1     |
| SLC16A7  | Q8N8S4_HUMAN | SAMD9    |
| SLC17A4  | Q8NBC0_HUMAN | SAMD9L   |
| SLC22A4  | Q8TEB0_HUMAN | SCN9A    |
| SLC4A4   | Q96HG1_HUMAN | SCUBE2   |
| SLFN11   | Q96NU5_HUMAN | SDC3     |
| SLFN5    | Q9BR82_HUMAN | SDPR     |
| SMAD6    | Q9H8A7_HUMAN | SEMA3C   |
| SMAD9    | Q9HCM6_HUMAN | SERINC2  |
| SMPD1    | RAB7L1       | SERPINB7 |
| SNED1    | RAD21L1      | SGCD     |
| SOX9     | RASL11A      | SGIP1    |
| SPESP1   | RBM43        | SH3YL1   |
| SPHK1    | RELN         | SHC4     |
| SPOCD1   | RFX2         | SIRPB1   |
| SRGN     | RGS20        | SIRPB2   |
| SSPN     | RIN2         | SLC14A1  |
| STAMBPL1 | RIN3         | SLC16A4  |
| STARD13  | RNASEL       | SLC16A7  |
| STIM1    | RNF152       | SLC1A4   |
| STK32B   | RNF185       | SLC22A4  |
| SYDE1    | RNF215       | SLC38A4  |
| SYT15    | ROM1         | SLC4A4   |
| SYTL3    | RRAD         | SLFN5    |
| SYTL4    | RUNDC2A      | SMAD6    |
| TACR2    | RUNX1        | SMAP1L   |
| TBC1D8B  | RUNX2        | SMPD1    |
| TBX2     | SAMD11       | SNCAIP   |
| TBX5     | SAMD5        | SNTB1    |
| TCEA3    | SAMD9        | SOX9     |
| TCF21    | SAMD9L       | SPESP1   |
| TCP11L2  | SCN9A        | SRGAP1   |
| TGFB111  | SCUBE2       | SRGN     |

|          |          |            |
|----------|----------|------------|
| TGFB1    | SDC3     | SSPN       |
| THSD4    | SDPR     | ST3GAL5    |
| TK2      | SEL1L    | STAM2      |
| TMCO4    | SERINC2  | STARD13    |
| TMEM142C | SERPINB8 | STARD5     |
| TMEM16A  | SETD7    | STK17B     |
| TMEM65   | SGIP1    | STS1_HUMAN |
| TNFSF4   | SHC4     | SYT15      |
| TNS1     | SHOX     | SYTL3      |
| TP53INP2 | SIM2     | TBX3       |
| TPP1     | SIRPB1   | TCF21      |
| TRIM38   | SIRPB2   | TEF        |
| TRPA1    | SIRT2    | TENC1      |
| TTLL1    | SIX1     | TGFB111    |
| UBE3B    | SLC13A2  | TGFB1      |
| USP40    | SLC14A1  | THSD4      |
| VCAM1    | SLC16A4  | TMCO4      |
| VDR      | SLC16A7  | TMEM130    |
| WFDC1    | SLC22A4  | TMOD2      |
| WIPF1    | SLC4A4   | TNFAIP8L3  |
| WNT5B    | SLC8A1   | TNFRSF10D  |
| ZBTB20   | SLFN11   | TNFSF4     |
| ZBTB38   | SLFN5    | TNS1       |
| ZEB1     | SMAD6    | TP53INP2   |
| ZER1     | SMAD9    | TRHDE      |
| ZFHX4    | SNED1    | TRIM38     |
| ZFPM2    | SOX9     | TRIM55     |
| ZNF25    | SPESP1   | TRIM7      |
| ZNF251   | SPHK1    | TTLL7      |
| ZNF343   | SQRDL    | UAP1L1     |
| ZNF436   | SRGN     | ULBP2      |
| ZNF439   | SSPN     | UNC84B     |
| ZNF503   | ST3GAL5  | USP40      |
| ZNF584   | STAMBPL1 | VCAM1      |
| ZNF800   | STARD13  | VEPH1      |
| ZNF804A  | STIM1    | VPS37D     |
|          | STK32B   | WDR66      |

|            |         |
|------------|---------|
| STS1_HUMAN | WFDC1   |
| SYDE1      | WNT16   |
| SYTL3      | WNT5B   |
| SYTL4      | ZBTB20  |
| TBC1D8B    | ZBTB7A  |
| TBX3       | ZEB1    |
| TBX5       | ZFAND2B |
| TBXAS1     | ZFP28   |
| TCF21      | ZMAT3   |
| TCP11L2    | ZMAT5   |
| TGFB111    | ZNF25   |
| TGFBI      | ZNF343  |
| TIGD6      | ZNF439  |
| TK2        | ZNF440  |
| TMEM142C   | ZNF491  |
| TMEM166    | ZNF804A |
| TMEM16A    | ZNF818  |
| TMEM173    | ZNFX1   |
| TMOD2      |         |
| TNFAIP6    |         |
| TNFRSF11B  |         |
| TNFSF4     |         |
| TNS1       |         |
| TP53INP2   |         |
| TPP1       |         |
| TRIM38     |         |
| TRPA1      |         |
| TSPAN9     |         |
| TTLL1      |         |
| TTLL7      |         |
| TULP3      |         |
| UBE3B      |         |
| USP40      |         |
| VCAM1      |         |
| VDR        |         |
| VEPH1      |         |
| WDR66      |         |

WFDC1  
WNT5B  
ZBTB20  
ZBTB38  
ZEB1  
ZER1  
ZFHX4  
ZFPM2  
ZHX1  
ZMAT3  
ZNF25  
ZNF251  
ZNF365  
ZNF425  
ZNF436  
ZNF439  
ZNF503  
ZNF524  
ZNF584  
ZNF804A  
ZNFX1

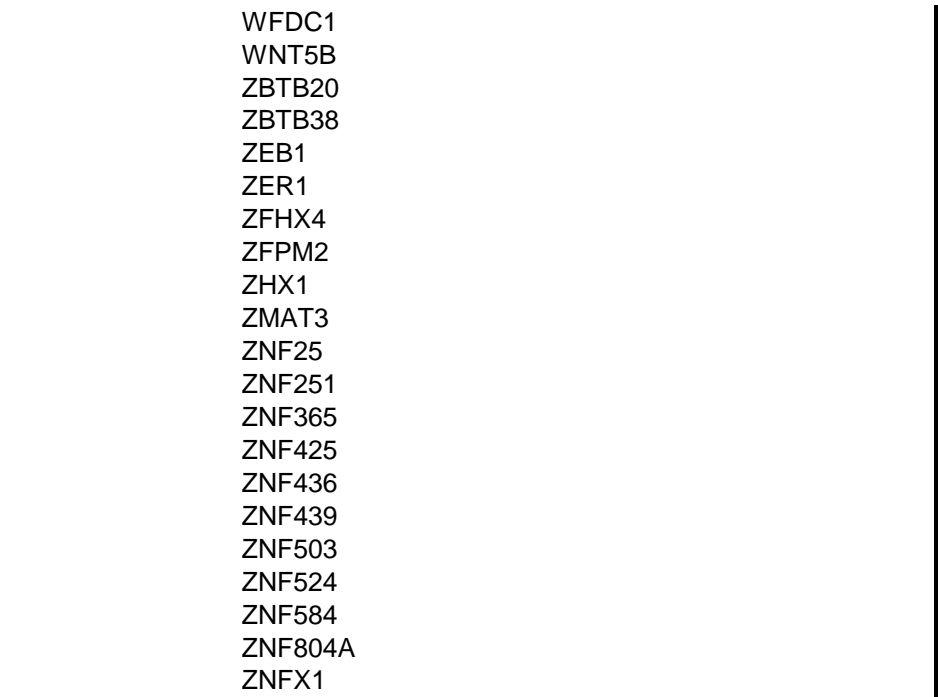

**Abnormally Silencing retained (Fig. 2c)**

| <b>MP4</b> | <b>MR46</b>  | <b>MR45</b>  | <b>MP2</b>      | <b>MP4</b>   |
|------------|--------------|--------------|-----------------|--------------|
| A4GALT     | AATK         | AATK         | ADAM20          | A1L162_HUMAN |
| ABCA1      | ARC          | ARC          | ADAMTS9         | ABHD12B      |
| ABTB2      | C1orf61      | C1orf61      | ANGPT2          | ACTA1        |
| ADAM12     | C21orf90     | C21orf90     | ANKRD21         | ADAM20       |
| ADAM23     | C9orf131     | C9orf131     | APOA1           | ADAMTS19     |
| ADAMTS12   | CCDC35       | CCDC35       | ARHGAP28        | ADAMTS9      |
| ADAMTS2    | DEF6         | CPT1B        | ARHGEF6         | ADCY2        |
| ADAMTS5    | DKK4         | DEF6         | ARSE            | ADD2         |
| ADRA1B     | EPHA2        | DKK4         | BMP2            | AIF1         |
| AFAP1L1    | GSTT1        | EBI3         | BMP4            | ALPL         |
| AHNAK2     | HB25_HUMAN   | EPHA2        | BMP6            | ANKRD21      |
| AK5        | HLA-DQB2     | FZD10        | C1orf61         | AP1M2        |
| ALDH1A3    | HLA-DRB5     | GLT1D1       | C1orf94         | APOA1        |
| ALPK2      | LDHC         | GSTT1        | C21orf129       | ARHGAP28     |
| ALS2CR16   | NXF3         | HB25_HUMAN   | C9orf131        | ARHGAP9      |
| AMOT       | PLAC1        | HLA-DQB2     | CCDC35          | ARRB1        |
| AMPD3      | Q8N8T8_HUMAN | HLA-DRB5     | CD48            | ARSE         |
| ANPEP      | SERHL_HUMAN  | LDHC         | CITED1          | ASB9         |
| AP3B2      | SGCA         | NXF3         | CNTNAP3         | ASPHD2       |
| AREG       | SLC5A9       | PLAC1        | CPAMD8          | ATP1A2       |
| ARHGAP24   | SMPX         | Q8N8T8_HUMAN | CSAG2           | ATP8B3       |
| ARHGAP29   | STARD8       | SERHL_HUMAN  | CSF1R           | AXIN2        |
| ARHGDIB    |              | SGCA         | CST1            | B3GAT1       |
| ARNTL2     |              | SLC5A9       | CST2            | BCL2L14      |
| ATHL1      |              | SMPX         | DIO3            | C10orf82     |
| AYTL1      |              | STARD8       | DKK4            | C13orf18     |
| BACE2      |              |              | DPYSL5          | C14orf115    |
| BCL6       |              |              | ENSG00000196525 | C19orf33     |
| BDKRB1     |              |              | FAM20A          | C1orf172     |
| BDKRB2     |              |              | FANK1           | C1orf34      |
| BDNF       |              |              | FOXD2           | C1orf61      |
| BFSP1      |              |              | FREM1           | C1orf94      |
| BGN        |              |              | FZD10           | C20orf103    |
| BHLHB3     |              |              | G0S2            | C20orf46     |
| BMF        |              |              | GABRE           | C20orf54     |

BNC2  
BST1  
BTN3A2  
C10orf114  
C10orf33  
C11orf69  
C14orf37  
C16orf30  
C1orf51  
C3orf59  
C8orf42  
C9orf121  
C9orf125  
CA12  
CACNA1H  
CAMK4  
CARD6  
CCDC80  
CCND2  
CDC14C  
CDH13  
CDKL5  
CDKN2B  
CDO1  
CEACAM1  
CHRM2  
CHST3  
CNIH3  
CNN1  
CNTN2  
COL12A1  
COL13A1  
COL16A1  
COL1A2  
COL4A6  
COL5A1  
COL6A2

GATA4  
GCNT1  
GGTLA4  
GJA4  
GLT1D1  
GRP  
GSTT1  
H19  
HAPLN1  
HB25\_HUMAN  
HLA-DQB2  
HLA-DRB5  
HLXB9  
HOXB9  
HOXD10  
HP  
HPR  
IGSF21  
IRX2  
KCNJ16  
KCNK12  
KIAA1772  
LAMA1  
LDHC  
LGI2  
LHX6  
MAF  
MAGEA6  
MAPK10  
MIXL1  
MYL4  
MYOM2  
NEFL  
NLRP2  
NPPA  
NSG1\_HUMAN  
O75264\_HUMAN

C21orf129  
C21orf63  
C21orf90  
C6orf117  
C6orf59  
C8orf47  
C9orf129  
C9orf131  
C9orf135  
C9orf61  
CA8  
CACNG6  
CADPS  
CALB1  
CAMTA1  
CAPN12  
CARD11  
CASP10  
CCKBR  
CCL26  
CCR7  
CD3D  
CD48  
CD52  
CD53  
CD70  
CD86  
CDH1  
CDH3  
CELSR2  
CER1  
CFP  
CGN  
CH25H  
CHODL  
CHRD1  
CHST8

COLEC12  
CPEB2  
CRIP2  
CRLF1  
CRYAB  
CTTNBP2  
CXCL12  
CXorf6  
DAB2IP  
DENND2A  
DIRAS1  
DKK1  
DKK3  
DNAH5  
DPP4  
DPYSL4  
DTX3L  
DUSP10  
ECE1  
EDN1  
EGFR  
EHD2  
ELK3  
ELTD1  
ENDOD1  
ENSG00000169549  
ENSG00000180672  
EPAS1  
EPHB2  
ETS1  
ETV6  
EYA2  
F10  
FAM113B  
FAM114A1  
FAM129A  
FAM46C

OLFM1  
OTX2  
PCDHB2  
PDZD4  
POU4F1  
PPAPDC1A  
PPFIA4  
PRAME  
PRTG  
Q9NWP0\_HUMAN  
RSPO3  
SCG2  
SEMA5B  
SERHL\_HUMAN  
SHC2  
SLCO2A1  
SMPX  
SPAG4  
SPIB  
SPRR3  
SYTL5  
TBX1  
TFF1  
THBD  
TLE2  
TLR4  
TMEM132B  
VAV1  
WNT3A  
ZAP70

CITED1  
CKMT1A  
CLDN6  
CNTNAP2  
CNTNAP3  
COBL  
CPNE8  
CPT1B  
CRHBP  
CRYM  
CST1  
CST2  
CXCL14  
CXXC4  
CXorf50  
CYP26A1  
CYP2S1  
DAZL  
DBC1  
DEF6  
DIO3  
DKK4  
DLEC1  
DLK1  
DMKN  
DOCK8  
DPYSL5  
DSC2  
DYSF  
EBI3  
EEF1A2  
EGLN3  
EIF4E3  
EMID2  
ENPP4  
ENSG00000187849  
ENSG00000196525

FAM59A  
FAM69A  
FAM79A  
FAS  
FBLN2  
FBXO44  
FER1L3  
FGF1  
FLJ90086  
FLNC  
FLRT3  
FMN2  
FMOD  
FOXF1  
FOXF2  
GABBR2  
GALNT10  
GALNT5  
GALNT6  
GAS6  
GATA6  
GLI1  
GLT25D2  
GLT8D2  
GLT8D4  
GPR124  
GPR176  
GPR30  
GPR37  
GPR56  
GPRIN1  
GREM1  
GREM2  
HAS2  
HBEGF  
HEG1  
HEPH

ENSG00000203935  
EPB41L4B  
EPA1  
ERC2  
EXOC3L  
FAAH2  
FAM110C  
FAM57B  
FAM77C  
FAM83F  
FGF18  
FILIP1  
FOLR1  
FOXA2  
FOXA3  
FREM1  
FRMD4B  
FXD6  
FZD3  
GABRE  
GAD1  
GAL3ST1  
GALNT14  
GAP43  
GATA4  
GBX2  
GDAP1L1  
GGT1  
GGTLA4  
GJA4  
GLYATL1  
GNA14  
GNAL  
GPC3  
GPR160  
GPR64  
GPR98



HSPB2  
HSPB8  
ICAM1  
ID4  
IFI16  
IGFBP3  
IGFBP4  
IGFBP5  
IL15  
IL17RA  
IL17RC  
IL1RAPL1  
IL32  
IL6  
INA  
INSR  
ITGA3  
ITGA6  
K1576\_HUMAN  
KCNG1  
KCNN2  
KCNS3  
KCTD1  
KIAA1462  
KIF26B  
KIFC3  
KIT  
KLF7  
KLF9  
KLHL13  
KRT19  
KRT80  
LAMB3  
LDB2  
LIF  
LOXL4  
LRP1

GPRIN2  
GRB7  
GRIA3  
GRIK5  
GRP  
GSC  
GSTT1  
H19  
HAS3  
HB25\_HUMAN  
HCN3  
HERC5  
HERC6  
HLA-DPA1  
HLA-DQB2  
HLA-DRB5  
HOMER2  
HOXB9  
HOXD10  
HP  
HPR  
HRASLS2  
IBRDC2  
IGSF21  
IGSF9  
IL17RD  
INADL  
IQCA  
IQGAP2  
IRX2  
IRX5  
ITGA9  
ITGB1BP3  
ITLN2  
ITM2A  
ITPKB  
JPH3

LRP11  
LRRC17  
LUM  
LUZP1  
LXN  
MAGI3  
MAMDC2  
MAP3K5  
Mar-04  
MATN2  
MFAP4  
MGST2  
MLPH  
MMP1  
MMP2  
MMP23A  
MOXD1  
MT1JP  
MT1M  
MYO10  
NAV2  
NEXN  
NID2  
NM\_001031628.1  
NNMT  
NOX4  
NP\_001001991.1  
NP\_001034703.1  
NP\_009007.2  
NP\_060101.2  
NP\_060851.1  
NP\_079045.1  
NP\_079117.2  
NP\_795372.1  
NR1D2  
NRIP3  
NRP2

KCNE1L  
KCNJ16  
KCNK12  
KCNQ2  
KCTD14  
KIAA1324L  
KIAA1772  
KIAA1822L  
KIF1A  
KIF21A  
KLF8  
KLKB1  
LAMA5  
LCK  
LEFTY1  
LEFTY2  
LEMD1  
LGALS12  
LIN28  
LIPG  
LOC402665  
LOC440338  
LONRF3  
LRRN1  
LTB  
M3KL4\_HUMAN  
MAF  
MANEAL  
MAOA  
MAP2K6  
MASP2  
MATN4  
MDFI  
MFNG  
MLRS\_HUMAN  
MMP25  
MMP9

NRXN3  
NR\_001296.2  
NT5E  
NTNG2  
NTRI\_HUMAN  
NUAK2  
NUDT18  
NUPR1\_HUMAN  
NXN  
OLFM2  
OLFML2A  
OLFML3  
OXTR  
PAPPA  
PAPSS2  
PARP9  
PCDHB11  
PCGF5  
PDE5A  
PDLIM1  
PDLIM3  
PDZK1  
PEG3  
PHLDA1  
PIK3CD  
PLAC9  
PLCB4  
PLCE1  
PLSCR4  
PLXDC2  
PLXNA3  
PPARG  
PPP1R3C  
PRDM1  
PREX1\_HUMAN  
PRICKLE2  
PRRX1

MREG  
MT1F  
MYL4  
MYL7  
MYO5B  
MYO5C  
NEBL  
NEFL  
NELL2  
NFASC  
NGFR  
NGFRAP1L1  
NHS  
NLRP12  
NLRP2  
NLRP7  
NNAT  
NODAL  
NPPA  
NPPB  
NP\_001005356.1  
NP\_060190.2  
NP\_061900.1  
NP\_073579.3  
NP\_115981.1  
NP\_116106.2  
NP\_775824.1  
NP\_997329.1  
NR0B1  
NR6A1  
NTS  
O75264\_HUMAN  
OLFM1  
OTX2  
OVOL2  
PADI2  
PCDH1

PRSS1  
PRSS35  
PSG6  
PSG8  
PSMB8  
PTGS1  
PTN  
PXDN  
PYCARD  
Q4ZG65\_HUMAN  
Q6ZP74\_HUMAN  
Q6ZV04\_HUMAN  
Q86V40\_HUMAN  
RAB3A  
RAB7L1  
RAD21L1  
RALGPS2  
RAMP1  
RASA3  
RASAL2  
RASGRF2  
RASSF4  
RBM24  
RGS4  
RIN1  
RNF152  
RNF182  
ROR1  
RORA  
RPS6KA6  
RTN2  
S100A3  
S100A4  
SALL1  
SAMD3  
SDSL  
SERINC2

PCDHA10  
PCDHA5  
PCYT1B  
PDE3B  
PDZD4  
PF4  
PIPOX  
PKP2  
PLA2G3  
PLAC1  
PLEKHH1  
PLP1  
POMC  
POT15\_HUMAN  
POU4F1  
PPFIA4  
PPFIBP2  
PPL  
PPM1J  
PPP1R1A  
PPP2R2C  
PRDM14  
PRKCH  
PROM1  
PRSS8  
PRTG  
PTCHD1  
PTGIS  
PTP4A3  
PTRZ1  
PUNC  
PVRL1  
Q5THZ5\_HUMAN  
Q7Z5Z9\_HUMAN  
Q8N503\_HUMAN  
Q8N819\_HUMAN  
Q96GK3\_HUMAN

SERPINB2  
SERPINB7  
SERPINE1  
SERPINF1  
SESN3  
SG493\_HUMAN  
SHANK3  
SHB  
SHC3  
SHROOM3  
SIRPA  
SIRPB2  
SLC15A3  
SLC16A14  
SLC37A2  
SLC4A8  
SLC7A11  
SLC7A14  
SLC7A7  
SLC9A7  
SLCO3A1  
SLFN5  
SMAD7  
SOCS1  
SOCS3  
SOD3  
SP110  
SP140  
SPG3A  
SPOCD1  
SSBP3  
STAT6  
STC1  
STC2  
STEAP2  
STS1\_HUMAN  
SYT1

Q96SQ3\_HUMAN  
Q9BYA7\_HUMAN  
RAB17  
RAB20  
RAB25  
RASGRP2  
RBM35A  
REGL  
RET  
RGMA  
RIMS2  
RIMS4  
RIPK4  
RNF175  
RTP1  
SALL3  
SCAMP5  
SCG3  
SELV\_HUMAN  
SEMA5B  
SERHL\_HUMAN  
SERINC5  
SERPINI1  
SFN  
SGCA  
SHC2  
SLC1A3  
SLC5A9  
SLC7A8  
SLCO2A1  
SMPX  
SOHLH2  
SORBS1  
SOX13  
SPAG4  
SPIB  
SPINK5

SYTL2  
TAP1  
TBC1D2  
TBX3  
TEK  
TENC1  
TFPI  
TGFB2  
THBS2  
TIMP3  
TMCO4  
TMEM142C  
TMEM16A  
TMEM22  
TMTC1  
TNFRSF14  
TNS1  
TRAF3IP2  
TRIM22  
TRPA1  
TRPC3  
TSPAN5  
TXNRD3  
UBTD1  
UNC5B  
USP41  
VDR  
WNK4  
WNT5B  
XYLT1  
ZEB1  
ZMAT3  
ZNF179  
ZNF462  
ZNF521  
ZNF703

SPOCK2  
SPON1  
SPP1  
SPRR3  
STARD8  
STMN2  
STRA6  
STX11  
SYK  
SYT17  
SYT6  
SYTL5  
TBX1  
TDGF3  
TESC  
TFF1  
TFF3  
THBD  
TIMP4  
TLE2  
TLR4  
TM4SF18  
TMEM132B  
TMEM144  
TMEM154  
TMEM28  
TNFRSF10C  
TNIK  
TNS4  
TRIM36  
UNC5D  
VAV1  
VAV3  
WDR27  
WFDC2  
WFIKKN1  
WNK3

WNT3A  
WSCD1  
XKR6  
XR\_017860.1  
YBX2  
ZAP70  
ZDHHC23  
ZHX2  
ZIC2  
ZIC3  
ZIC5  
ZNF423  
ZSWIM5
